# Supplementary material
Source: PubMed Central journal article supplement (PMC8756349)
Supplement: NIHMS1766078-supplement-Suppl_Data.pdf [file NIHMS1766078-supplement-Suppl_Data.pdf]

**Supplemental Information**

**Mahmud N et al.** (Biol Blood Marrow Transplant. 2014 Apr;20(4):480-9. doi: 10.1016/j.bbmt.2013.12.562. Epub 2013 Dec 26)

The Supplemental Information includes 6 tables and supplemental experimental methods.

**Supplemental Table 1.** Sequences of primers used for real-time quantitative PCR analyses.

| Gene Name | Forward Primer           | Reverse Primer:                |
|-----------|--------------------------|--------------------------------|
| GAPDH     | TGCACCACCAACTGCTTAGC     | TCTTCTGGGTGGCAGTGATG           |
| GATA2     | ATTGTCAGACGACAACCACCACCT | TTCCTTCTTCATGGTCAGTGGCCT       |
| HoxB4     | ACCTCGACACCCGCTAACAAATGA | AATGGGCACGAAAGATGAGGGAG<br>A   |
| Bmi1      | TGTGTGTGCTTTGTGGAGGGTACT | TGCTGGTCTCCAGGTAACGAACA<br>A   |
| Ezh2      | CAGTTTGTGGCGGAAGCGTGTA   | AGGATGTGCACAGGCTGTATCCTT       |
| GATA1     | ACACCAGGTGAACCGGCCACT    | CCTTCGGCTCCTCCTGTGCC           |
| Pu.1      | AACGCCAAACGCACGAGTATTACC | TGAAGTTGTTCTCGGCGAAGCTCT       |
| P21       | GGTCTGACCCCAAACACCTTC    | AACGGGAACCAGGACACATG           |
| S100A8    | GGGATGACCTGAAGAAATTGCTA  | TGTTGATATCCAACCTCTTTGAACC<br>A |
| Cyp11A1   | TGGCATCTCCACCCGCAGTC     | GAGCTTCTCCCTGTAAATCGGGCC       |
| Alox5     | TGTGGGAAGCCATCAGGACGTTCA | CCGCATGCCGTACACGTAGACAT<br>C   |
| Col14A1   | GTGTGGCCGATGCAGATTACTCGG | CCACTGGACAGGTTGCTGATGCT<br>G   |
| F2RL2     | AGGCTTCCATTTGCTGCTGACACA | TCCATGCCACTCTGACAAAAAGT<br>GGG |
| MPEG1     | CAACCAGACGAGGATGGCCACCTA | GACTGCTCTGGCTGTCTTGGAGGA       |
| ALDH1A1   | GGCCGCAAGACAGGCTTTTCAGAT | ATTGACTCCATTGTCGCCAGCAGC       |
| BMPRIA    | ACTGCCCCCTGTTGTCATAGGTCC | ACGTCTGCTTGAGATGCTCTTGCA       |

Primers were designed using the PrimerQuest software (Integrated DNA Technologies, Coralville, IA).

**Supplemental Table 2.** Primer sequences for the amplification of immunoprecipitated DNA.

| Gene Name | Region Amplified | Forward Primer                | Reverse Primer           |
|-----------|------------------|-------------------------------|--------------------------|
| HoxB4     | -537 to -727     | GCGAAGTCTCCCCGAATTAGTG        | GTCTCTATGGGGAGTTAGGTTACT |
| BMI-1     | -240 to -506     | CAGCAACTATGAAATAATCGTAG       | TCCGCCTCCGCCTCGACCTCCAAC |
| GATA2     | -55 to -435      | TCGGACTGACCACGTTACAGCGGTGAAGG | AAGCCAGCCAATCAACGCCCGC   |
| Pu.1      | -4 to -224       | GACTATCTCCAGCGGCAGGCC         | CCGGGCTCCGAGTCGGTCAGATC  |
| GAPDH     | +528 to +793     | ACAGTCCATGCCATCACTGCC         | GCCTGCTTCACCACCTTCTTG    |

**Supplement Table 3.** Gene promoter regions subjected to CpG site pyrosequencing.

| <b>Gene</b> | <b>Region Analysed</b> |
|-------------|------------------------|
| GATA2       | -366 to -216           |
| S100A8      | -1010 to -851          |
| pu.1        | -296 to -198           |
| Alox5       | +44 to +98             |
| HoxB4       | -178 to -44            |
| GATA1       | -203 to -186           |
| CYP11A1     | -62 to +113            |

Genomic DNA was isolated from primary, 5azaD/TSA-, or VPA-expanded enriched CD34+ cells following culture using the Blood and Cell Culture DNA kit (Qiagen, Valencia CA). Genomic DNA was bisulphite treated using the EZ Methylation kit (Zymo Research, Irvine, CA).

**Supplemental Table 4.** The top associated network functions and most up regulated genes within each network as revealed by Ingenuity Pathway Analysis of 113 putative HSC expansion genes.

| Gene Network                                                                       | Probeset ID  | Gene Symbol | 5azaD/TSA vs. Control |          | 5azaD/TSA vs. VPA |          |
|------------------------------------------------------------------------------------|--------------|-------------|-----------------------|----------|-------------------|----------|
|                                                                                    |              |             | Fold Change           | p-value  | Fold Change       | p-value  |
| Cellular Movement, Cellular Growth and Proliferation, Cancer <sup>1</sup>          | 212865_s_at  | COL14A1     | 22.94                 | 3.05E-07 | 20.47             | 4.19E-07 |
|                                                                                    | 201744_s_at  | LUM         | 12.90                 | 1.17E-04 | 9.27              | 3.24E-04 |
|                                                                                    | 202917_s_at  | S100A8      | 6.36                  | 1.60E-03 | 7.02              | 1.14E-03 |
|                                                                                    | 202411_at    | IFI27       | 5.31                  | 1.45E-03 | 4.53              | 2.73E-03 |
|                                                                                    | 224646_x_at  | H19         | 5.18                  | 1.06E-05 | 4.77              | 1.62E-05 |
| Cellular Development, Cellular Growth and Proliferation, Cell Cycle <sup>2</sup>   | 212865_s_at  | COL14A1     | 22.94                 | 3.05E-07 | 20.47             | 4.19E-07 |
|                                                                                    | 201744_s_at  | LUM         | 12.90                 | 1.17E-04 | 9.27              | 3.24E-04 |
|                                                                                    | 1554892_a_at | MS4A3       | 8.90                  | 4.97E-05 | 9.72              | 3.65E-05 |
|                                                                                    | 210254_at    | MS4A3       | 8.74                  | 3.00E-05 | 11.30             | 1.22E-05 |
|                                                                                    | 202917_s_at  | S100A8      | 6.36                  | 1.60E-03 | 7.02              | 1.14E-03 |
| Cell Cycle, Nervous System Development and Function, Lipid Metabolism <sup>3</sup> | 204309_at    | CYP11A1     | 11.35                 | 3.69E-05 | 11.96             | 3.11E-05 |
|                                                                                    | 1554892_a_at | MS4A3       | 8.90                  | 4.97E-05 | 9.72              | 3.65E-05 |
|                                                                                    | 210254_at    | MS4A3       | 8.74                  | 3.00E-05 | 11.30             | 1.22E-05 |
|                                                                                    | 202284_s_at  | CDKN1A      | 4.33                  | 2.54E-06 | 2.81              | 4.32E-05 |
|                                                                                    | 202284_s_at  | CDKN1A      | 4.33                  | 2.54E-06 | 2.81              | 4.32E-05 |
| Inflammatory Response, Cellular Movement, Immune Cell Trafficking <sup>4</sup>     | 201744_s_at  | LUM         | 12.90                 | 1.17E-04 | 9.27              | 3.24E-04 |
|                                                                                    | 204309_at    | CYP11A1     | 11.35                 | 3.69E-05 | 11.96             | 3.11E-05 |
|                                                                                    | 202917_s_at  | S100A8      | 6.36                  | 1.60E-03 | 7.02              | 1.14E-03 |
|                                                                                    | 214183_s_at  | TKTL1       | 5.50                  | 1.12E-03 | 4.37              | 2.82E-03 |
|                                                                                    | 202284_s_at  | CDKN1A      | 4.33                  | 2.54E-06 | 2.81              | 4.32E-05 |

<sup>1</sup> Score: 47; <sup>2</sup> Score: 32; <sup>3</sup> Score: 26; <sup>4</sup> Score: 24. Fold change (> 2 fold) of transcripts in 5azaD/TSA-expanded CD34+ cells compared to CD34+ cells expanded under other conditions,  $p < 0.01$ .

**Supplemental Table 5.** The top associated network functions and most up regulated genes within each network as revealed by Ingenuity Pathway Analysis of 278 putative HSC maintenance genes.

| Gene Network                                                                                           | Probeset ID | Gene Symbol | VPA vs. Control |          | 5azaD/TSA vs. Control |          |
|--------------------------------------------------------------------------------------------------------|-------------|-------------|-----------------|----------|-----------------------|----------|
|                                                                                                        |             |             | Fold Change     | p-value  | Fold Change           | p-value  |
| Cellular Function and Maintenance, Molecular Transport, Gene Expression <sup>1</sup>                   | 213578_at   | BMPR1A      | 9.93            | 2.05E-07 | 2.46                  | 3.83E-04 |
|                                                                                                        | 216598_s_at | CCL2        | 8.71            | 8.68E-05 | 6.00                  | 3.50E-04 |
|                                                                                                        | 217820_s_at | ENAH        | 7.02            | 3.86E-06 | 2.67                  | 7.40E-04 |
|                                                                                                        | 206857_s_at | FKBP1B      | 6.20            | 6.10E-07 | 3.10                  | 3.16E-05 |
|                                                                                                        | 213413_at   | STON1       | 5.68            | 1.21E-04 | 2.85                  | 3.74E-03 |
| Cellular Movement, Cell Morphology, Cellular Growth and Proliferation <sup>2</sup>                     | 213578_at   | BMPR1A      | 9.93            | 2.05E-07 | 2.46                  | 3.83E-04 |
|                                                                                                        | 216598_s_at | CCL2        | 8.71            | 8.68E-05 | 6.00                  | 3.50E-04 |
|                                                                                                        | 206857_s_at | FKBP1B      | 6.20            | 6.10E-07 | 3.10                  | 3.16E-05 |
|                                                                                                        | 212224_at   | ALDH1A1     | 6.17            | 1.24E-08 | 2.76                  | 1.91E-06 |
|                                                                                                        | 203394_s_at | HES1        | 5.58            | 1.01E-04 | 2.65                  | 4.69E-03 |
| Cellular Growth and Proliferation, Cell Cycle, DNA Replication, Recombination, and Repair <sup>3</sup> | 213578_at   | BMPR1A      | 9.93            | 2.05E-07 | 2.46                  | 3.83E-04 |
|                                                                                                        | 216598_s_at | CCL2        | 8.71            | 8.68E-05 | 6.00                  | 3.50E-04 |
|                                                                                                        | 206857_s_at | FKBP1B      | 6.20            | 6.10E-07 | 3.10                  | 3.16E-05 |
|                                                                                                        | 212224_at   | ALDH1A1     | 6.17            | 1.24E-08 | 2.76                  | 1.91E-06 |
|                                                                                                        | 203394_s_at | HES1        | 5.58            | 1.01E-04 | 2.65                  | 4.69E-03 |
| Cellular Development, Haematopoiesis, Gene Expression <sup>4</sup>                                     | 213578_at   | BMPR1A      | 9.93            | 2.05E-07 | 2.46                  | 3.83E-04 |
|                                                                                                        | 216598_s_at | CCL2        | 8.71            | 8.68E-05 | 6.00                  | 3.50E-04 |
|                                                                                                        | 206857_s_at | FKBP1B      | 6.20            | 6.10E-07 | 3.10                  | 3.16E-05 |
|                                                                                                        | 212224_at   | ALDH1A1     | 6.17            | 1.24E-08 | 2.76                  | 1.91E-06 |
|                                                                                                        | 203394_s_at | HES1        | 5.58            | 1.01E-04 | 2.65                  | 4.69E-03 |

<sup>1</sup> Score: 47; <sup>2</sup> Score: 32; <sup>3</sup> Score: 26; <sup>4</sup> Score: 24. Fold change (> 2 fold) of transcripts in VPA-expanded CD34+ cells compared to CD34+ cells expanded under other conditions,  $p < 0.01$ .

**Supplemental Table 6.1.** Top molecules from gene networks revealed by Ingenuity Pathway Analyses of 88 genes associated with HSC regenerative (haematopoietic reconstitution) and non-regenerative (lack of haematopoietic reconstitution) phenotypes.

| Gene Network                                                                                      | Probeset ID  | Gene Symbol | Fold Change | <i>p</i> -value |
|---------------------------------------------------------------------------------------------------|--------------|-------------|-------------|-----------------|
| Inflammatory Response, Renal Inflammation, Renal Damage                                           | 204924_at    | TLR2        | -1.67127    | 2.17E-05        |
|                                                                                                   | 211657_at    | CEACAM6     | -2.74469    | 3.64E-05        |
| Small Molecule Biochemistry, Cellular Development, Haematological System Development and Function | 1554503_a_at | OSCAR       | -1.78511    | 3.04E-06        |
|                                                                                                   | 204924_at    | TLR2        | -1.67127    | 2.17E-05        |
|                                                                                                   | 209960_at    | HGF         | -3.31895    | 6.02E-05        |
| Cell Morphology, Cell Signalling, Small Molecule Biochemistry                                     | 1554503_a_at | OSCAR       | -1.78511    | 3.04E-06        |

**Supplemental Table 6.2.** The top 7 cellular and molecular functions and their corresponding molecules revealed by Ingenuity Pathway Analyses of 88 genes associated with HSC regenerative and non-regenerative phenotypes.

| Category                                       | <i>p</i> -value     | Molecules                                                                                                                 |
|------------------------------------------------|---------------------|---------------------------------------------------------------------------------------------------------------------------|
| Haematological System Development and Function | 6.21E-04 - 2.25E-02 | PDPN, TLR2, LAMA5, ITGB2, HGF, ITGB3                                                                                      |
| Cell Death                                     | 7.57E-04 - 2.25E-02 | LAMA5, PHIP, BAD, STK25, MAPK11, ITGB3, MECOM, NDNL2, TLR2, OSCAR, ITGB2, CEACAM6 (includes EG:4680), HGF, PEA15, GALNT10 |
| Cellular Growth and Proliferation              | 7.57E-04 - 1.94E-02 | LAMA5, PHIP, LAPTM4B, BAD, GNA11, MAPK11, MECOM, ITGB3, TLR2, NDNL2, ITGB2, CEACAM6 (includes EG:4680), RETN, HGF, PEA15  |
| Haematopoiesis                                 | 7.57E-04 - 1.88E-02 | LAMA5, ITGB2, HGF, TPPP2, ITGB3                                                                                           |
| Cancer                                         | 2.96E-03 - 1.51E-02 | PDPN, LAMA5, CEACAM6 (includes EG:4680), HGF, PEA15, ITGB3, MECOM                                                         |
| Cell Cycle                                     | 3.79E-03 - 2.25E-02 | BAD, HGF, PEA15                                                                                                           |
| DNA Replication, Recombination, and Repair     | 3.79E-03 - 3.79E-03 | PEA15                                                                                                                     |

## Supplemental Methods

### Microarray studies and data analysis

All microarray studies were performed in triplicate, except for TSA/5azaD (reverse sequence)-expanded CD34+ cells, for which microarray studies were performed in duplicate. Each of the replicate samples represented a pool of 4 to 8 independent CB units. CD34+ cells, which represent less than 1% of MNCs in a CB unit while still heterogeneous in stem/progenitor cell content, are enriched in repopulating HSCs; further enrichment is limited by the rarity of the cell population and the number of cells needed for typical microarray studies. Therefore, the use of enriched CD34+ cells for microarray studies is a practical compromise, and indeed CD34+ cells are the most common source of cells used for gene microarrays to study normal haematopoiesis or human leukaemia.

Total RNA was extracted from either uncultured primary CD34+ cells or enriched CD34+ cells (>90% purity) after expansion culture with or without CMA. RNA was extracted using TRIzol (Life Technologies, NY, USA) followed by Qiagen column purification (Qiagen, Valencia, CA, USA). The samples for microarray studies included control, 5azaD/TSA-expanded, VPA-expanded, TSA/5azaD-expanded, and primary uncultured CD34+ cells. RNA integrity was evaluated using an Agilent 2100 Bioanalyzer (Agilent Technologies; Palo Alto, CA), and purity and concentration were determined using a NanoDrop 8000 (NanoDrop, Wilmington, DE, USA).

Subsequent data analyses were performed using the Partek Genomics Suite with the CEL files obtained from GCOS. The data were normalised using the RMA algorithm. Significant genes were selected at > 2-fold and  $p < 0.05$ . Global functional analyses, network analyses, and canonical pathway analyses were performed using Ingenuity Pathway Analysis 8.6 (Ingenuity Systems, Redwood City).
